# Supplementary material for: Analysis of the Physiological Activities of Scd6 through Its Interaction with Hmt1
Source: PubMed Central journal article supplement (PMC5077174; doi:10.1371/journal.pone.0164773), 2016-10-24
Supplement: pone.0164773.s005.pdf [file pone.0164773.s005.pdf]

**S1 Table. Yeast strains used in this study.**

| Name      | Genotype                                                                                                                                                                                                                            | Source     |
|-----------|-------------------------------------------------------------------------------------------------------------------------------------------------------------------------------------------------------------------------------------|------------|
| 10B       | <i>MAT<math>\alpha</math> ade2 trp1 can1 leu2 his3 ura3 GAL psi+ HOp-ADE2-HO 3' UTR</i>                                                                                                                                             | [1]        |
| 10BD      | <i>MAT<math>\alpha</math>/MAT<math>\alpha</math> ade2/ade2 trp1/trp1 can1/can1 leu2/leu2 his3/his3 ura3/ura3</i>                                                                                                                    | [1]        |
| 10BD-ds   | <i>MAT<math>\alpha</math>/MAT<math>\alpha</math> ade2/ade2 trp1/trp1 can1/can1 leu2/leu2 his3/his3 ura3/ura3 DHH1/dhh1<math>\Delta</math>::CgLEU2 SCD6/scd6<math>\Delta</math>::CgHIS3</i>                                          | This study |
| 10BD-sh   | <i>MAT<math>\alpha</math>/MAT<math>\alpha</math> ade2/ade2 trp1/trp1 can1/can1 leu2/leu2 his3/his3 ura3/ura3 SCD6/scd6<math>\Delta</math>::CgLEU2 HMT1/hmt1<math>\Delta</math>::CgHIS3</i>                                          | This study |
| 10BD-dh   | <i>MAT<math>\alpha</math>/MAT<math>\alpha</math> ade2/ade2 trp1/trp1 can1/can1 leu2/leu2 his3/his3 ura3/ura3 DHH1/dhh1<math>\Delta</math>::CgLEU2 HMT1/hmt1<math>\Delta</math>::CgHIS3</i>                                          | This study |
| 10BD-dsh  | <i>MAT<math>\alpha</math>/MAT<math>\alpha</math> ade2/ade2 trp1/trp1 can1/can1 leu2/leu2 his3/his3 ura3/ura3 DHH1/dhh1<math>\Delta</math>::CgLEU2 SCD6/scd6<math>\Delta</math>::CgHIS3<br/>HMT1/hmt1<math>\Delta</math>::CgTRP1</i> | This study |
| 10BD-s    | <i>MAT<math>\alpha</math>/MAT<math>\alpha</math> ade2/ade2 trp1/trp1 can1/can1 leu2/leu2 his3/his3 ura3/ura3 SCD6/scd6<math>\Delta</math>::CgLEU2</i>                                                                               | This study |
| s-DCP2    | <i>MAT<math>\alpha</math>/MAT<math>\alpha</math> ade2/ade2 trp1/trp1 can1/can1 leu2/leu2 his3/his3 ura3/ura3 SCD6/scd6<math>\Delta</math>::CgLEU2 DCP2/DCP2-GFP::HIS3</i>                                                           | This study |
| d-DCP2    | <i>MAT<math>\alpha</math>/MAT<math>\alpha</math> ade2/ade2 trp1/trp1 can1/can1 leu2/leu2 his3/his3 ura3/ura3 DHH1/dhh1<math>\Delta</math>::CgLEU2 DCP2/DCP2-GFP::HIS3</i>                                                           | This study |
| ds-DCP2   | <i>MAT<math>\alpha</math>/MAT<math>\alpha</math> ade2/ade2 trp1/trp1 can1/can1 leu2/leu2 his3/his3 ura3/ura3 DHH1/dhh1<math>\Delta</math>::CgLEU2 SCD6/scd6<math>\Delta</math>::CgHIS3<br/>DCP2/DCP2-GFP::HIS3</i>                  | This study |
| h-DCP2    | <i>MAT<math>\alpha</math>/MAT<math>\alpha</math> ade2/ade2 trp1/trp1 can1/can1 leu2/leu2 his3/his3 ura3/ura3 HMT1/hmt1<math>\Delta</math>::CgHIS3 DCP2/DCP2-GFP::HIS3</i>                                                           | This study |
| dh-DCP2   | <i>MAT<math>\alpha</math>/MAT<math>\alpha</math> ade2/ade2 trp1/trp1 can1/can1 leu2/leu2 his3/his3 ura3/ura3 DHH1/dhh1<math>\Delta</math>::CgLEU2 HMT1/hmt1<math>\Delta</math>::CgHIS3<br/>DCP2/DCP2-GFP::HIS3</i>                  | This study |
| 10BD-h    | <i>MAT<math>\alpha</math>/MAT<math>\alpha</math> ade2/ade2 trp1/trp1 can1/can1 leu2/leu2 his3/his3 ura3/ura3 HMT1/hmt1<math>\Delta</math>::CgHIS3</i>                                                                               | This study |
| h-S       | <i>MAT<math>\alpha</math>/MAT<math>\alpha</math> ade2/ade2 trp1/trp1 can1/can1 leu2/leu2 his3/his3 ura3/ura3 HMT1/hmt1<math>\Delta</math>::CgHIS3<br/>SCD6/SCD6-mCherry::natNT2</i>                                                 | This study |
| 10BD-HMT1 | <i>MAT<math>\alpha</math>/MAT<math>\alpha</math> ade2/ade2 trp1/trp1 can1/can1 leu2/leu2 his3/his3 ura3/ura3 HMT1/HMT1-13myc::kanMX6</i>                                                                                            | This study |
| s-1       | <i>MAT<math>\alpha</math> ade2 trp1 can1 leu2 his3 ura3 scd6<math>\Delta</math>::CgLEU2</i>                                                                                                                                         | This study |
| 10B-S     | <i>MAT<math>\alpha</math> ade2 trp1 can1 leu2 his3 ura3 GAL psi+ HOp-ADE2-HO 3' UTR SCD6-mCherry::natNT2</i>                                                                                                                        | This study |
| h-1       | <i>MAT<math>\alpha</math> ade2 trp1 can1 leu2 his3 ura3 hmt1<math>\Delta</math>::CgHIS3</i>                                                                                                                                         | This study |
| ds-1      | <i>MAT<math>\alpha</math> ade2 trp1 can1 leu2 his3 ura3 dhh1<math>\Delta</math>::CgLEU2 scd6<math>\Delta</math>::CgHIS3</i>                                                                                                         | This study |
| 10B-DCP2  | <i>MAT<math>\alpha</math> ade2 trp1 can1 leu2 his3 ura3 GAL psi+ HOp-ADE2-HO 3' UTR DCP2-GFP::HIS3</i>                                                                                                                              | This study |

|           |                                                                                                         |            |
|-----------|---------------------------------------------------------------------------------------------------------|------------|
| s-DCP2-1  | <i>MATa ade2 trp1 can1 leu2 his3 ura3 scd6Δ::CgLEU2 DCP2-GFP::HIS3</i>                                  | This study |
| d-DCP2-1  | <i>MATa ade2 trp1 can1 leu2 his3 ura3 dhh1Δ::CgLEU2 DCP2-GFP::HIS3</i>                                  | This study |
| ds-DCP2-1 | <i>MATa ade2 trp1 can1 leu2 his3 ura3 dhh1Δ::CgLEU2 scd6Δ::CgLEU2 DCP2-GFP::HIS3</i>                    | This study |
| h-DCP2-1  | <i>MATa ade2 trp1 can1 leu2 his3 ura3 hmt1Δ::CgHIS3 DCP2-GFP::HIS3</i>                                  | This study |
| dh-DCP2-1 | <i>MATa ade2 trp1 can1 leu2 his3 ura3 dhh1Δ::CgLEU2 hmt1Δ::CgHIS3 DCP2-GFP::HIS3</i>                    | This study |
| HMT1-1    | <i>MATa ade2 trp1 can1 leu2 his3 ura3 HMT1-13myc::kanMX6</i>                                            | This study |
| PJ69-4A   | <i>MATa trp1-901 leu2-3,112 ura3-52 his3-200 gal4D gal80D LYS2::GAL1-HIS3 GAL2-ADE2 met2::GAL7-lacZ</i> | [2]        |

1. Tadauchi T, Matsumoto K, Herskowitz I, Irie K. Post-transcriptional regulation through the HO 3'-UTR by Mpt5, a yeast homolog of Pumilio and FBF. *The EMBO journal*. 2001;20(3):552-61. doi: 10.1093/emboj/20.3.552. PubMed PMID: 11157761; PubMed Central PMCID: PMC133468.
2. James P, Halladay J, Craig EA. Genomic libraries and a host strain designed for highly efficient two-hybrid selection in yeast. *Genetics*. 1996;144(4):1425-36. PubMed PMID: 8978031; PubMed Central PMCID: PMC1207695.
