# Supplementary material for: Analysis of the Physiological Activities of Scd6 through Its Interaction with Hmt1
Source: PubMed Central journal article supplement (PMC5077174; doi:10.1371/journal.pone.0164773), 2016-10-24
Supplement: pone.0164773.s006.pdf [file pone.0164773.s006.pdf]

**S2 Table. Plasmids used in this study.**

| Name                  | Description                                                  | Source        |
|-----------------------|--------------------------------------------------------------|---------------|
| YCplac33              | <i>URA3, CEN-ARS</i>                                         | [1]           |
| YCplac33-SCD6         | <i>URA3, CEN-ARS, SCD6</i>                                   | This study    |
| YCplac33-SCD6RK       | <i>URA3, CEN-ARS, SCD6RK</i>                                 | This study    |
| YCplac33-SCD6RF       | <i>URA3, CEN-ARS, SCD6RF</i>                                 | This study    |
| YCplac33-SCD6FLAG     | <i>URA3, CEN-ARS, SCD6FLAG</i>                               | This study    |
| YEplac195             | <i>URA3, 2<math>\mu</math></i>                               | [1]           |
| YEplac195-SCD6        | <i>URA3, 2<math>\mu</math>, SCD6</i>                         | This study    |
| YEplac195-SCD6FLAG    | <i>URA3, 2<math>\mu</math>, SCD6FLAG</i>                     | This study    |
| YEplac195-SCD6RK-FLAG | <i>URA3, 2<math>\mu</math>, SCD6RK-FLAG</i>                  | This study    |
| YEplac195-SCD6RF-FLAG | <i>URA3, 2<math>\mu</math>, SCD6RF-FLAG</i>                  | This study    |
| pGBD-c1               | <i>TRP1, 2<math>\mu</math>, ADH1pr-GAL4-BD</i>               | [2]           |
| pGBD-c1-SCD6          | <i>TRP1, 2<math>\mu</math>, ADH1pr-GAL4-BD-SCD6</i>          | This study    |
| pGAD-c1               | <i>LEU2, 2<math>\mu</math>, ADH1pr-GAL4-AD</i>               | [2]           |
| pGAD-c1-HMT1          | <i>LEU2, 2<math>\mu</math>, ADH1pr-GAL4-AD-HMT1</i>          | This study    |
| pCgLEU2               | PCR template, <i>C. glabrata</i> <i>LEU2</i> in <i>pUC19</i> | [3]           |
| pCgHIS3               | PCR template, <i>C. glabrata</i> <i>HIS3</i> in <i>pUC19</i> | [3]           |
| pCgTRP1               | PCR template, <i>C. glabrata</i> <i>TRP1</i> in <i>pUC19</i> | [3]           |
| pFA6a-13myc-kanMX6    | PCR template, <i>13myc-ADH1t::kanMX6</i>                     | [4]           |
| pRS314-EDC3-GFP       | <i>TRP1, CEN-ARS, EDC3-GFP</i>                               | This study    |
| pRS316-SCD6-mRFP      | <i>URA3, CEN-ARS, SCD6-mRFP</i>                              | This study    |
| pRS316-SCD6RF-mRFP    | <i>URA3, CEN-ARS, SCD6RF-mRFP</i>                            | This study    |
| pRS316-SCD6RK-mRFP    | <i>URA3, CEN-ARS, SCD6RK-mRFP</i>                            | This study    |
| pGEX-5X-1             | <i>GST-fusion expression vector</i>                          | GE Healthcare |
| pGEX-5X-1-SCD6        | <i>GST-SCD6</i>                                              | This study    |

pET28a (+)  
pET28a-HMT1

*His<sub>6</sub>-fusion expression vector*  
*His<sub>6</sub>-HMT1*

Novagen  
This study

1. Gietz RD, Sugino A. New yeast-Escherichia coli shuttle vectors constructed with in vitro mutagenized yeast genes lacking six-base pair restriction sites. *Gene*. 1988;74(2):527-34. Epub 1988/12/30. PubMed PMID: 3073106.
2. James P, Halladay J, Craig EA. Genomic libraries and a host strain designed for highly efficient two-hybrid selection in yeast. *Genetics*. 1996;144(4):1425-36. Epub 1996/12/01. PubMed PMID: 8978031; PubMed Central PMCID: PMCPMC1207695.
3. Sakumoto N, Mukai Y, Uchida K, Kouchi T, Kuwajima J, Nakagawa Y, et al. A series of protein phosphatase gene disruptants in *Saccharomyces cerevisiae*. *Yeast (Chichester, England)*. 1999;15(15):1669-79. Epub 1999/11/26. doi: 10.1002/(sici)1097-0061(199911)15:15<1669::aid-yea480>3.0.co;2-6. PubMed PMID: 10572263.
4. Longtine MS, McKenzie A, 3rd, Demarini DJ, Shah NG, Wach A, Brachat A, et al. Additional modules for versatile and economical PCR-based gene deletion and modification in *Saccharomyces cerevisiae*. *Yeast (Chichester, England)*. 1998;14(10):953-61. Epub 1998/08/26. doi: 10.1002/(sici)1097-0061(199807)14:10<953::aid-yea293>3.0.co;2-u. PubMed PMID: 9717241.
