# Supplementary material for: Analysis of the Physiological Activities of Scd6 through Its Interaction with Hmt1
Source: PubMed Central journal article supplement (PMC5077174; doi:10.1371/journal.pone.0164773), 2016-10-24
Supplement: pone.0164773.s007.pdf [file pone.0164773.s007.pdf]

**S3 Table. Result of Yeast two-hybrid screening**

| <u>Gene</u>   | <u>Description</u>                                                     |
|---------------|------------------------------------------------------------------------|
| <i>HSE1</i>   | Subunit of the endosomal Vps27p-Hse1 complex                           |
| <i>GYP1</i>   | <i>cis</i> -Golgi GTPase-activating (GAP) protein for yeast Rabs       |
| <i>RPS28A</i> | Protein component of the small (40S) ribosomal subunit                 |
| <i>RPS28B</i> | Protein component of the small (40S) ribosomal subunit                 |
| <i>ISF1</i>   | Serine rich, hydrophilic protein                                       |
| <i>DCP1</i>   | Subunit of Dcp1p-Dcp2p decapping enzyme complex                        |
| <i>HMT1</i>   | Arginine methyltransferase                                             |
| <i>EBS1</i>   | Protein involved in translation inhibition and nonsense-mediated decay |
| <i>UTP11</i>  | Subunit of U3-containing Small Subunit (SSU) processome complex        |
| <i>HSP82</i>  | Hsp90 chaperone                                                        |
